# Supplementary material for: P2Y12 Inhibitor or Aspirin Following Dual Antiplatelet Therapy After Percutaneous Coronary Intervention: A Systematic Review and Meta-Analysis
Source: Research Square preprint supplement (doi:10.21203/rs.3.rs-8129117/v1), 2025-11-18

**Supplementary Appendix**

Table S1: Detailed search strings for all databases and registers

| Database | Search string | Articles retrieved |
| --- | --- | --- |
| PubMed/MEDLINE | ("Percutaneous Coronary Intervention"[MeSH Terms] OR "Drug-Eluting Stents"[MeSH Terms] OR "Percutaneous Coronary Intervention"[Title/Abstract] OR "PCI"[Title/Abstract] OR "coronary angioplasty"[Title/Abstract] OR "stent*"[Title/Abstract] OR "drug eluting stent*"[Title/Abstract]) AND ("Clopidogrel"[MeSH Terms] OR "Prasugrel Hydrochloride"[MeSH Terms] OR "Ticagrelor"[MeSH Terms] OR "Platelet Aggregation Inhibitors"[MeSH Terms] OR "Clopidogrel"[Title/Abstract] OR "prasugrel"[Title/Abstract] OR "Ticagrelor"[Title/Abstract] OR "p2y12 inhibitor*"[Title/Abstract] OR "adenosine diphosphate receptor antagonist*"[Title/Abstract]) AND ("Aspirin"[MeSH Terms] OR "Aspirin"[Title/Abstract] OR "acetylsalicylic acid"[Title/Abstract]) AND ("Monotherapy"[Title/Abstract] OR "single antiplatelet therapy"[Title/Abstract] OR "SAPT"[Title/Abstract]) AND ("randomized controlled trial"[Publication Type] OR "randomized"[Title/Abstract] OR "randomised"[Title/Abstract] OR "randomly"[Title/Abstract] OR "trial"[Title/Abstract]) | 298 |
| Embase | ('percutaneous coronary intervention'/exp OR 'coronary angioplasty'/exp OR 'drug eluting stent'/exp  OR (PCI OR "percutaneous coronary intervention" OR "coronary angioplasty" OR stent* OR "drug-eluting stent*"):ti,ab)  AND  ('clopidogrel'/exp OR 'prasugrel'/exp OR 'ticagrelor'/exp OR 'platelet aggregation inhibitor'/exp  OR (clopidogrel OR prasugrel OR ticagrelor OR "P2Y12 inhibitor*" OR "adenosine diphosphate receptor antagonist*"):ti,ab)  AND  ('aspirin'/exp OR 'acetylsalicylic acid'/exp OR (aspirin OR "acetylsalicylic acid"):ti,ab)  AND  (monotherapy:ti,ab OR "single antiplatelet therapy":ti,ab OR SAPT:ti,ab)  AND  ('randomized controlled trial'/exp OR random*:ti,ab OR trial:ti,ab) | 648 |
| Cochrane Central Register of RCTs | (percutaneous coronary intervention OR PCI OR coronary angioplasty OR stent OR "drug-eluting stent")  AND  (clopidogrel OR prasugrel OR ticagrelor OR "P2Y12 inhibitor")  AND  (aspirin OR "acetylsalicylic acid")  AND  (monotherapy OR "single antiplatelet therapy" OR SAPT) | 345 |
| Clinicaltrials.gov | (percutaneous coronary intervention OR PCI OR coronary angioplasty OR stent OR "drug-eluting stent") AND  (clopidogrel OR prasugrel OR ticagrelor OR "P2Y12 inhibitor")  AND (aspirin OR "acetylsalicylic acid") AND (monotherapy OR "single antiplatelet therapy" OR SAPT) | 7 |

**Figure S1.** Effect of P2Y12 inhibitor monotherapy versus aspirin monotherapy on all-cause mortality

**
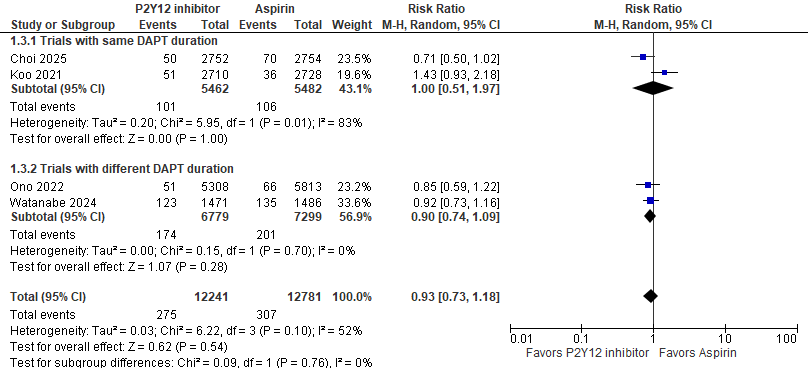
**

**Figure S2.** Effect of P2Y12 inhibitor monotherapy versus aspirin monotherapy on cardiovascular mortality

**
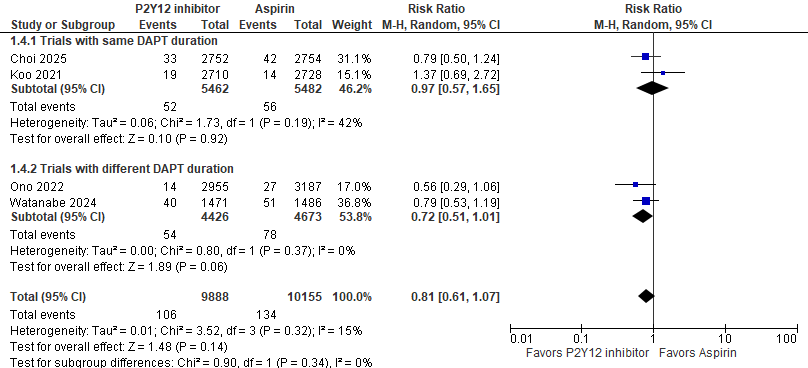
**

**Figure S3.** Effect of P2Y12 inhibitor monotherapy versus aspirin monotherapy on myocardial infarction

**
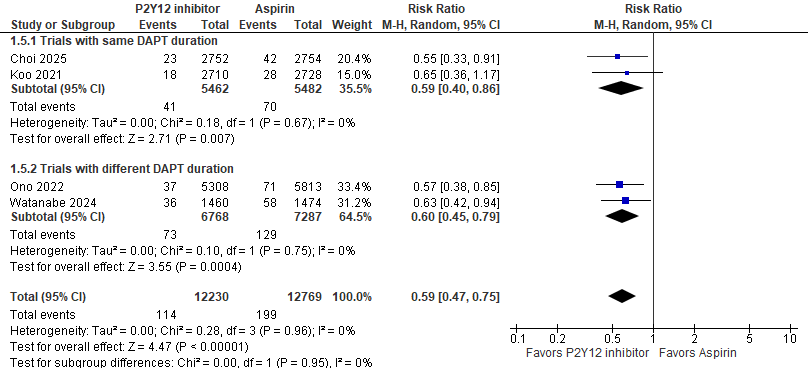
**

**Figure S4.** Effect of P2Y12 inhibitor monotherapy versus aspirin monotherapy for any stroke

**
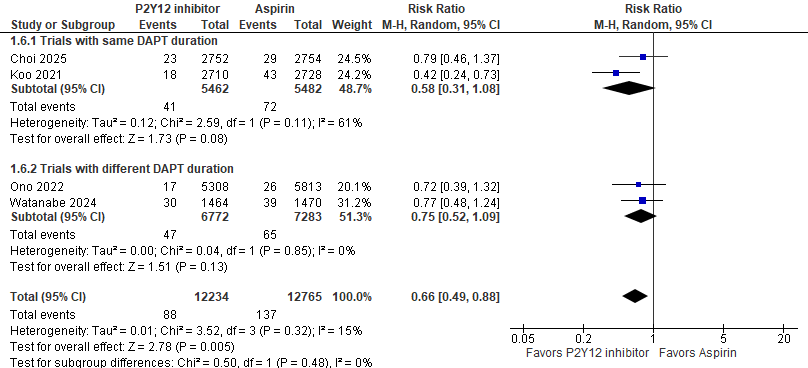
**

**Figure S5.** Effect of P2Y12 inhibitor monotherapy versus aspirin monotherapy for ischemic stroke

**
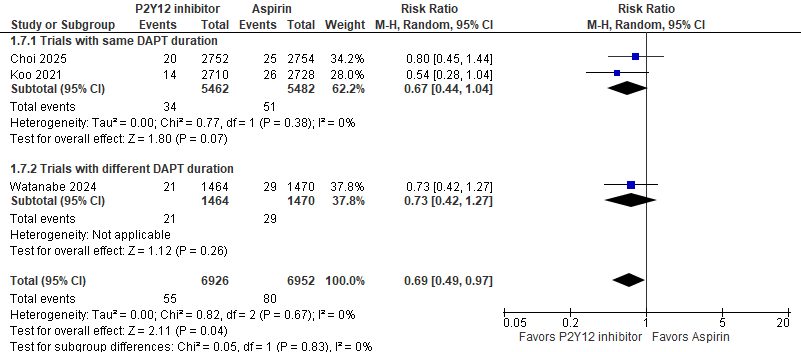
**

**Figure S6.** Effect of P2Y12 inhibitor monotherapy versus aspirin monotherapy for hemorrhagic stroke

**
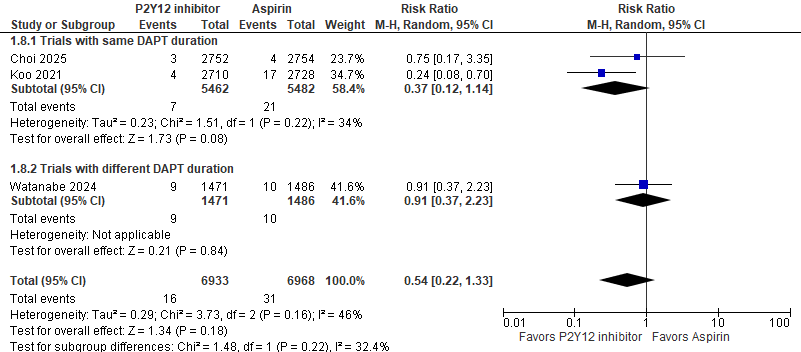
**

**Figure S7.** Effect of P2Y12 inhibitor monotherapy versus aspirin monotherapy for stent thrombosis

**
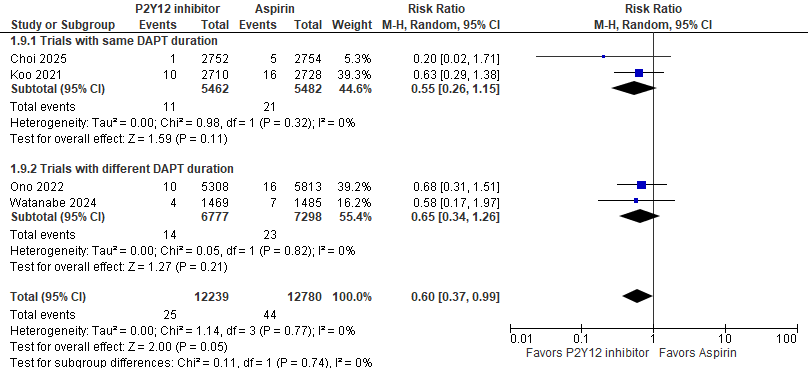
**

**Figure S8.** Effect of P2Y12 inhibitor monotherapy versus aspirin monotherapy for any revascularization

**
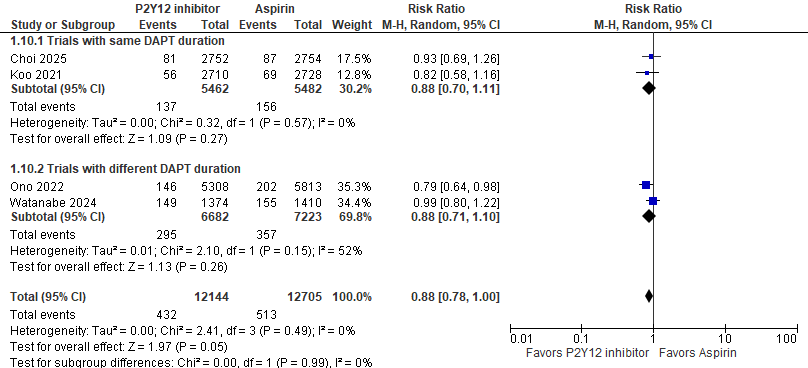
**

**Figure S9.** Effect of P2Y12 inhibitor monotherapy versus aspirin monotherapy for target lesion revascularization

**
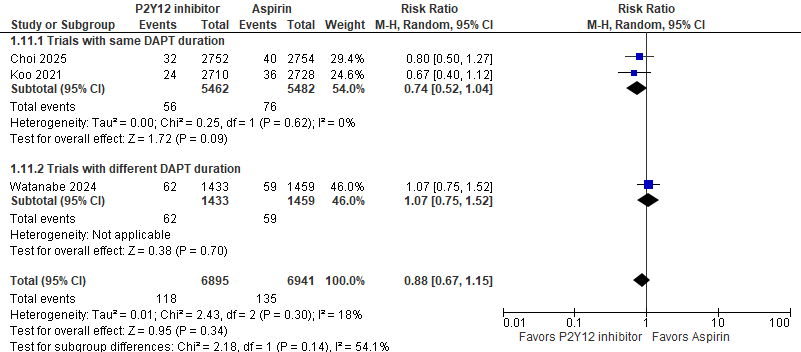
**

**Figure S10.** Effect of P2Y12 inhibitor monotherapy versus aspirin monotherapy for target vessel revascularization

**
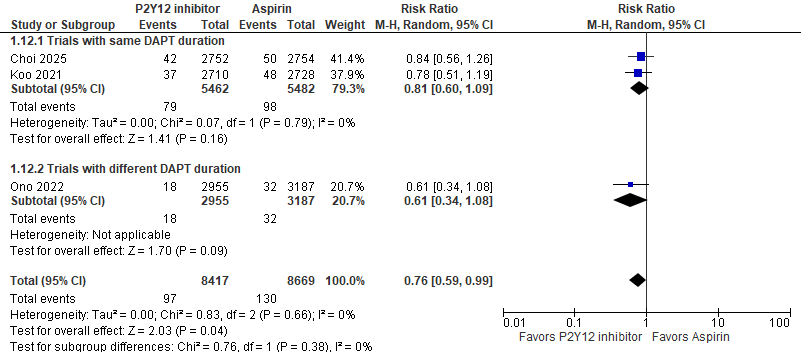
**

**Figure S11.** Effect of P2Y12 inhibitor monotherapy versus aspirin monotherapy for any bleeding

**
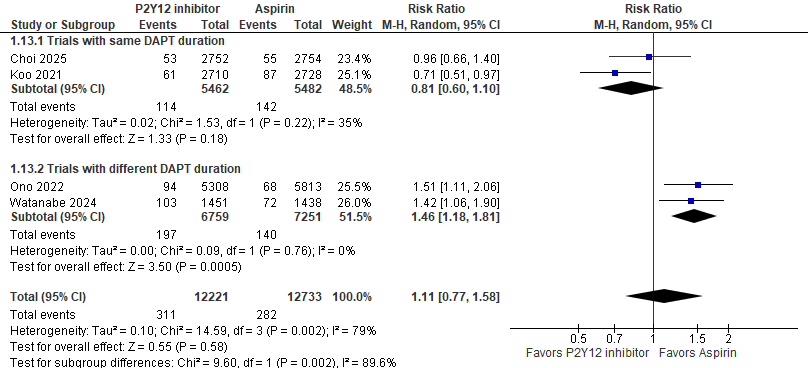
**

**Figure S12.** Effect of P2Y12 inhibitor monotherapy versus aspirin monotherapy for major bleeding

**
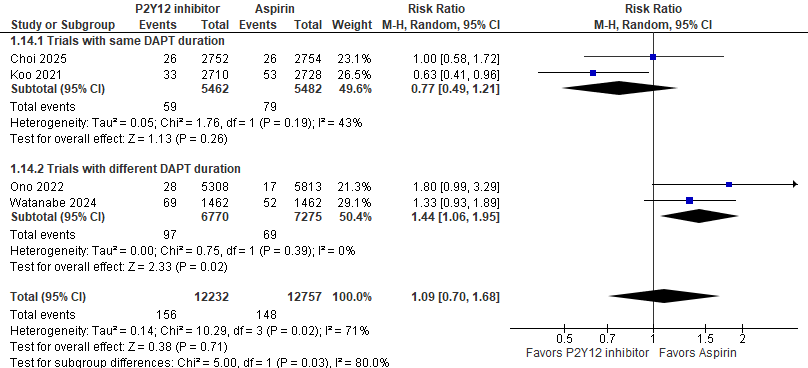
**

**Figure S13.** Effect of P2Y12 inhibitor monotherapy versus aspirin monotherapy for gastrointestinal bleeding


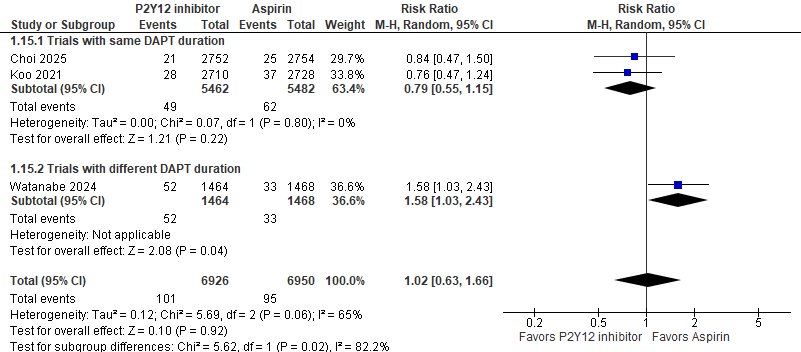

Supplement: Supplementary file 1 [file 4595d067e4190bad1602715a.docx]
